1 **Title: Improved management facilitates return of an iconic fish species**

2 **Authors:** Brian R. MacKenzie<sup>1\*</sup>, Kim Aarestrup<sup>2</sup>, Mads Christoffersen<sup>3</sup>, Mark R. Payne<sup>1</sup>, Claus  
3 Sørensen<sup>4</sup>, Henrik S. Lund<sup>5</sup>, Michele Casini<sup>6</sup>

4 **Affiliations:**

5

6 <sup>1</sup>National Institute for Aquatic Resources (DTU Aqua), Section for Oceans and Arctic, Technical  
7 University of Denmark, Kemitorvet, Building 150, DK 2800 Kongens Lyngby, Denmark;

8 <sup>2</sup>National Institute for Aquatic Resources (DTU Aqua), Section for Freshwater Fisheries  
9 Ecology, Technical University of Denmark, Silkeborg, Denmark;

10 <sup>3</sup>National Institute for Aquatic Resources (DTU Aqua), Section for Ecosystem Based Marine  
11 Management, Technical University of Denmark, Kemitorvet, Building 150, DK 2800 Kongens  
12 Lyngby, Denmark;

13 <sup>4</sup>Marinexperten, H.C.Ørstedesvej 9, DK 9900 Frederikshavn, Denmark

14 <sup>5</sup>Danish Fishermen Producer Organisation, Nordensvej 3, Taulov, DK 7000 Fredericia, Denmark

15 <sup>6</sup>Swedish University of Agricultural Sciences, Department of Aquatic Resources, Institute of  
16 Marine Research, Turistgatan 5, Lysekil 45330, Sweden

17 \*Correspondence to: [brm@aqua.dtu.dk](mailto:brm@aqua.dtu.dk).

18

19

20 **Abstract:**

21 Declines and losses of biota which persist for long periods often lead to a shifting baseline of  
22 where populations and species should live and neglect or abandonment of recovery actions  
23 aimed at ecological restoration. Such declines are frequently accompanied by contractions in  
24 distribution, negative ecological impacts and diminishing economic benefits. Here we show  
25 using citizen science information and data that after 50-60 years of near total absence from  
26 waters near Denmark, Norway and Sweden, the iconic top predator and highly migratory species  
27 bluefin tuna, *Thunnus thynnus*, returned by the hundreds if not thousands during August-October  
28 2016. This remarkable return has been facilitated by improved fishery management for bluefin  
29 tuna and its prey. Its reappearance, despite a recent history of mismanagement and illegal  
30 fishing which led to population decline, offers hope that other marine ecological recoveries are  
31 possible under improved management of fisheries and ecosystems.

32

33 **Short title:** Return of an iconic fish species

34 **One Sentence Summary:** Improved management helps bring back an ocean icon to northern  
35 Europe.

36

37 **Significance Statement:**

38 Commercial fisheries are often perceived being in a state of decline and collapse, putting food  
39 and economic security at risk. Such declines are frequently accompanied by contractions in  
40 stock distribution, negative ecological impacts and diminishing economic benefits. Here we  
41 present an example based on one of the world's most valuable and controversial fish species,

42 bluefin tuna, which demonstrates that effective management of both bluefin tuna and its prey has  
43 been a key factor leading to a remarkable reoccupation of formerly lost habitat. This  
44 reappearance, following decades of absence, occurred despite the bluefin tuna stock having had a  
45 recent, long history of unsustainable and illegal exploitation. Marine ecological recovery actions  
46 can be successful, even in situations which may initially appear intractable.

47

## 48 **Introduction:**

49

50 Recovering the biomass and spatial range of depleted fish stocks is a challenge to fisheries  
51 managers and conservation ecologists (1–3). Once lost, former biomasses and ranges often  
52 disappear from human memory, thereby reducing motivation for and impairing recovery efforts  
53 (4–6). Biomass and range recovery often take longer than anticipated, even when fishing is  
54 reduced below sustainable levels, due to factors such as bycatch fishing mortality (i. e., captures  
55 as bycatch in other fisheries), and changes in stock productivity (1–3, 7, 8). Species that are  
56 highly migratory and whose migrations take them into the high seas and multiple fishing  
57 jurisdictions, such as tunas and billfishes, are potentially even more vulnerable to depletion and  
58 prolonged recovery times than stocks under single or few fishery jurisdictions (2, 9).

59 Here we report a recovery of the former range of distribution by a highly migratory, highly  
60 valuable, iconic top predator fish species (bluefin tuna, *Thunnus thynnus*). This species was the  
61 target of unsustainable exploitation for many years in the 1990s-2000s, and its biomass declined  
62 to record low levels in the late 2000s (10). As one of the world's most valuable fish species, it  
63 has also been the subject of much scientific, public and conservation NGO scrutiny (11).

64 Bluefin tuna spawn in sub-tropical regions (e.g., Mediterranean Sea) and then migrate north long  
65 distances as adults to summer and autumn foraging areas (12, 13). In the northeast Atlantic,  
66 historical adult foraging areas are located in the Bay of Biscay, on the northwest European  
67 continental shelf off Ireland and the UK, and in the Norwegian Sea-North Sea-Skagerrak-  
68 Kattegat-Øresund (the latter are hereafter referred to as northern European waters;  
69 Supplementary Figure S1 showing ICES areas and sea names (12, 14)). Bluefin tuna occupy  
70 these waters in summer-early autumn before migrating southwards to overwintering areas. This  
71 long-distance migratory behaviour is a part of the species' life-history, having evolved through  
72 generations (13).

73 However, the migrations to northern European waters stopped almost completely in the early-  
74 mid-1960s and bluefin tuna have been extremely rare in the area since the 1970s (14, 15); the  
75 species has not supported commercial or recreational fisheries in the area since then (10)  
76 (Supplementary Figure S2). The reasons for both the disappearance and the long period before  
77 reappearance are unclear, but likely due to a combination of overexploitation of juveniles and  
78 adults of both the tuna and their prey, and changing oceanographic conditions (14, 16–18).

79 We describe the re-appearance using citizen science data (i. e., observations from non-scientists  
80 pursuing activities on or near the sea) and discuss possible reasons why it happened. Given the  
81 high level of illegal and unsustainable exploitation of this species in the recent past (mid-late  
82 1990s until ca. 2008-2010; (10)), the recovery of the habitat and range of this species is  
83 extraordinary and could become a classic example of how recoveries can occur under a suitable  
84 combination of fishery management regulations and ecosystem conditions.

85 **Results:**

86 Bluefin tuna observations in 2015 and 2016:

87 We found and received many reports of bluefin tuna in the region. The observations are  
88 summarized in Figure 1 and Supplementary Table S2. The reports included observations of  
89 single individual tunas and of schools of various sizes from a few specimens (2-10) to hundreds.  
90 The species is relatively easy to identify and distinguish in this area, mainly because of their  
91 surface jumping behaviour, body shape, color and size. The sizes of tuna observed were usually  
92 large (ca. 1.5 – 3 m) and the jumping or surface-breaking behaviour is characteristic of this  
93 species. All observations we present are based on individuals which are partially or entirely out  
94 of the water due to jumping and surface swimming, which facilitated reliable identification; the  
95 observations are supported in many cases by photographs or videos available on public social  
96 media and angling or news media websites in Scandinavia. Some of these photographs are  
97 shown as part of Figure 2 and as Supplementary Figure S3, and some online videos of bluefin  
98 tuna jumping are listed in Supplementary Table S3.

99 The locations of most of the sightings we obtained were in the central part of the eastern  
100 Skagerrak, along the Swedish west coast in the Skagerrak, and in the Kattegat (Figure 1). For  
101 example, recreational fishing tour boats and individual recreational fishermen and the Swedish  
102 Coast Guard observed individual bluefin tuna swimming at the surface and jumping clear of the  
103 water near a Swedish national marine park (Kosterhavet). The estimated sizes of these bluefin  
104 tuna were 2-3 m. One bluefin tuna was caught by a Danish recreational angler north of Skagen,  
105 Denmark in the Skagerrak on Sept. 19 and released alive after capture. This fish was measured  
106 in the water to be 3.03 m and estimated to weigh app. 400-450 kg (19).

107 At nearly the same time (Sept. 17, 2016) and ca. 7 deg. latitude farther north, bluefin tuna were  
108 captured as part of a targeted commercial fishing operation in the Norwegian Sea, off Ona  
109 (62.8603°N 6.5543°E ), Møre, Norway, approximately halfway between Bergen and Trondheim.  
110 The tuna caught (N = 190) each weighed ca. 170-300 kg (20–22). These tuna were captured by a  
111 Norwegian fishing vessel as part of the Norwegian bluefin tuna quota. Several Danish  
112 commercial fishermen, including one of the co-authors of this investigation (HSL), reported that  
113 they repeatedly saw schools in a localized area north of Skagen on several days during ca. two  
114 weeks in mid-late September, 2016; the total number of tunas observed on some days was in the  
115 hundreds. On Sept. 30, a school of 6-8 bluefin tuna were seen 200-250 m off the beach along the  
116 northern Danish Kattegat coast near Frederikshavn.

117 The first observation available to us in 2016 was made on August 12. A man in his sailboat,  
118 coming from the south through Øresund, observed a single tuna jumping out of the water four  
119 times, about 100 meters from his boat. The observation was made ca. 700-800 metres from the  
120 Danish coastline. The last observation reported to us was a sighting by a commercial fisherman  
121 in the Skagerrak on October 20. The cumulative amount of reports indicates that the species was  
122 present in large numbers for at least 2.5 months during late summer-autumn.

123 Ecosystem conditions:

124 The longest available time series of potential prey biomasses are from ICES stock assessments  
125 for herring and mackerel stocks in the North Sea, Norwegian Sea and northeast Atlantic. These  
126 show that the biomasses have been high since the late 1980s-early 1990s for the three stocks in  
127 the northeast Atlantic Ocean. The sum of the three biomasses has been at record-high levels  
128 since the early 2000s (Figure 3).

129 At the smaller spatial scale of the Skagerrak-Kattegat, demersal research surveys in late  
130 summer-autumn show that catch rates (considered to be a relative indicator of biomass) for four  
131 potential prey species (herring, sprat, mackerel, anchovy) were relatively low in 2016. The most  
132 abundant of these species is usually herring; however its abundance peaked in 2011 and has  
133 declined to low levels since then, including in 2015 and 2016. Other demersal and the pelagic  
134 surveys also show that prey abundance in 2015 and 2016 was approximately average or even  
135 below-average (Supplimentary Figure S4).

136 August-October surface temperatures have been well above long-term average since 1994 when  
137 a significant regime shift occurred (STARS test;  $P < 0.0001$  (31)); this shift is evident in the  
138 larger northeast Atlantic region and the Skagerrak-Kattegat sub-region where our tuna sightings  
139 have been made. However temperatures in 2015 and 2016 were not unusually warm compared  
140 to other years during the most recent regime.

#### 141 **Discussion:**

142 Bluefin tuna appear to have re-discovered former foraging habitat in northern European waters,  
143 which they vacated about 40-50 years ago. The observations are identical to those reported in  
144 historical fishery reports, newspapers and scientific literature from the 1920s-1960s (Figure 2),  
145 when bluefin tuna were common in these waters (e. g., (23, 24)); the jumping and surface-  
146 breaking swimming behaviour is typical for bluefin tuna foraging on prey species (23, 25). Our  
147 observations indicate that bluefin tuna were abundant throughout the combined Skagerrak-  
148 Kattegat and coastal Norwegian Sea region. Since neither Denmark nor Sweden has a fishing  
149 quota, and there are no surveys potentially monitoring the distribution and abundance of bluefin  
150 tuna, the public observations are essential for providing evidence of their return to these waters.

151 Cause of reappearance:

152 Given the long absence from the Skagerrak-Kattegat and neighboring waters, one must ask why  
153 bluefin tuna has finally returned now. The factor which has likely contributed most to the return  
154 is improved bluefin tuna fishery management since ca. the mid-late 2000s. Several changes were  
155 made during this period, including reductions in quotas, increases in minimum landing sizes  
156 from 6 to 10 kg and then to 30 kg so that a much larger share of juveniles can now survive long  
157 enough to reach maturity (assumed to be at an age of 4 years, or ca. 25 kg (10)), improved catch  
158 reporting requirements and documentation, and strengthened fishery surveillance and  
159 enforcement (10, 11).

160 Prior to implementation of these changes, the stock was overexploited both legally (because  
161 countries allocated themselves higher quota limits than those recommended by ICCAT  
162 (International Commission for the Conservation of Atlantic Tunas) scientists as being  
163 scientifically sustainable in the long term), and illegally (e. g., landings often exceeded the  
164 biologically sustainable limits agreed by the countries during many years in the late 1990s and  
165 early 2000s). Before the new regulations were implemented, historical exploitation of juveniles  
166 in southern parts of the stock range was high since the 1950s and has been considered to be a  
167 major factor leading to the disappearance and subsequent continued absence of bluefin tuna from  
168 northern parts of the range (18). In addition, the parent stock biomass in the early-mid-2000s was  
169 perceived to be declining (10) and at a rate that if continued could have met criteria for listing  
170 this stock as “critically endangered” according to IUCN (International Union for the  
171 Conservation of Nature) criteria (26).



172 Implementation of the new fishery management regulations appears to have had positive effects.  
173 Shortly after, several stock indicators of abundance started increasing, including the production  
174 rate of new young bluefin tuna “recruits” (10, 11). As the stock has increased, bluefin tuna  
175 appears to have expanded its migratory range, a pattern common among recovering fish stocks  
176 (3, 27), to explore new feeding habitats and to reduce density-dependent competition for prey,  
177 including into some northern areas beyond formerly documented distribution ranges such as  
178 Denmark Strait (east of Greenland (28)). This exploratory foraging behaviour may have led  
179 them to return to the northern European shelf waters, where they apparently have found  
180 sufficient prey for foraging.

181 A secondary reason for the return to these waters may be the relatively high biomasses of  
182 potential energy-rich prey species such as mackerel, herring, and sprat. Herring and mackerel  
183 dominate pelagic fish biomass in the region and their biomasses have recovered to or beyond  
184 historical estimates (29). Some of these species (herring and mackerel) were also overexploited  
185 in the 1950s-1970s leading to local collapses and fishery closures for these species. These  
186 declines may have been a factor inhibiting earlier return of bluefin tuna to this region. However  
187 following implementation of more sustainable fishing practices, the biomasses of these species  
188 have recovered, but the tunas did not reappear in large numbers until several years after the prey  
189 biomass recovered. This delay suggests that the main reason for the reappearance of bluefin  
190 tuna in the region was the increase in tuna biomass itself, and the time required to re-learn  
191 former migration pathways and foraging habitats (17, 30).

192 Moreover, as a large, fast-swimming schooling species with high daily energy intake, bluefin  
193 tuna have high potential for quickly learning where prey concentrations are located. For  
194 example, bluefin tuna have learned to follow or locate mackerel migrations to Iceland and east

195 Greenland waters in the early 2010s and have been caught as bycatch in Greenlandic mackerel  
196 fishing operations (28). It is likely therefore that if bluefin tuna had been more abundant in the  
197 1990s and 2000s, they would have already appeared in high abundance in the Norwegian-North  
198 Sea-Skagerrak-Kattegat area several years earlier than now.

199 Ocean temperature conditions are also known to affect tuna distributions and migrations (16, 31,  
200 32), and have been generally warmer since 1994. However temperatures in 2015 or 2016 were  
201 not exceptionally warm and were in fact colder than in some earlier years in the recent warm  
202 regime (post-1994). Notably, bluefin tuna have been present in the Skagerrak-Kattegat during  
203 many earlier years (e. g., 1920s-60s) when temperatures were lower than during the post-1994  
204 regime (compare Figure 3 and Supplementary Figure S2), and have occupied colder areas farther  
205 north in the past (e. g., in the Norwegian Sea and along the west Norwegian coast; see Ref.(24)  
206 for temperature data). We conclude that temperatures in the Skagerrak-Kattegat or northeast  
207 Atlantic region appear to have had little direct role on the re-appearance of bluefin tuna, although  
208 they may have had indirect effects via changes in local food abundance, migration behaviour or  
209 distribution. However the exact mechanisms by which temperature may have acted, if at all, are  
210 unclear and remain speculative.

211 Appearances of bluefin tuna in other northern regions also suggest that the species range has  
212 expanded, possibly due to its increased abundances. Bluefin tuna have appeared for the first  
213 time known to science in waters north of its usual summer feeding range and entered the  
214 Denmark Strait-Irminger Sea in 2012 (28). The entry of bluefin tuna in this region is likely due  
215 to the higher tuna abundance, warmer temperatures in a habitat which formerly was close to or  
216 colder than the lower tolerance limit for bluefin tuna, and large biomass of a key prey (mackerel)  
217 (28), whose summer distribution has also been extending into these waters since the 2010s (33).

218 In summary, both food and temperature conditions have been higher than average for many years  
219 before the tuna returned to the Skagerrak-Kattegat and probably also the wider North Sea-  
220 Norwegian Sea-Skagerrak-Kattegat region. We consider it unlikely that either of these factors  
221 in 2015-2016 were the main direct drivers for the recent appearance of bluefin tuna in the  
222 Skagerrak-Kattegat region, although adequate prey and temperature conditions likely induced  
223 exploratory foraging bluefin tuna to remain in this region, once it was re-discovered.

224 Contribution of citizen science to bluefin tuna ecology:

225 For reasons explained above, our investigation relies on input from the public to document the  
226 species presence in this region. As with all citizen science reports, there is a possibility for some  
227 false, biased and otherwise incorrect reporting. We believe that such records are not likely  
228 present in our compilation because of the nearly simultaneous nature of the records over a wide  
229 area (e. g., the many sightings reported in the eastern Skagerrak-Kattegat on nearly the same day  
230 as the large commercial catch in central Norwegian coastal waters), the similarity of the reported  
231 behaviour to historical sightings of tuna in the region (e. g.,(23); see Figure 2 of main  
232 manuscript and Supplementary Figure S3) and the distinguishable features of bluefin tuna  
233 behaviour and size that reduce the likelihood of misidentification with other species.

234 Moreover, some of the reports were made by highly reputable observers, including on-duty  
235 officers of national coast guard services or by off-duty members of our research vessels while  
236 participating in recreational sea-based activities. Their observations and reports were identical to  
237 those made by other members of the public and by commercial and recreational fishermen  
238 targeting other species. For example, some fishermen observed tuna while trawling for pelagic  
239 fish (e. g., herring and mackerel) that are prey for bluefin tuna in this region. Lastly, several of

240 the reports and our interviews via email or telephone include statements by the observers that  
241 they had never seen such behaviour before despite years and even decades of activity on the sea  
242 and that they had knowledge of the species' former presence in the area from older generations.  
243 We are confident therefore that our observations represent a valid and reliable source of  
244 documentary evidence of the presence of the species in these waters.

245 We are aware however that the reports based on citizen reporting reflect the spatial distribution  
246 of where the reporting observers were located. That is, they do not necessarily represent the full  
247 spatial distribution of where the tuna were located because (1) some tuna may have been  
248 observed in other areas, but not reported to us, (2) some tuna may have been present in other  
249 areas (and of course depths), but not seen by any human observers; and (3) observers were surely  
250 present over a much wider area than indicated by our few reports, but it is not possible to know  
251 which of those observers saw or did not see bluefin tuna. The spatial distribution of tuna based  
252 on our observations must therefore be interpreted cautiously, and we cannot exclude the  
253 possibility that bluefin tuna were present over a much wider area than is indicated by our data.

254 We have tried to minimize such observer bias by making broad contact to the public and  
255 especially commercial fishermen (e. g., via their associations). Nevertheless, to obtain a more  
256 representative distribution in the area, alternative methods would need to be employed such as  
257 aerial surveying via airplanes (25, 34) or with drones (35) or tagging with electronic tags (36, 37)  
258 and subsequent modelling (30, 38). In addition, increased public awareness of the species in the  
259 area and the need for its documentation could also increase public reporting of bluefin tuna  
260 observations and the reliability of distributional maps. Such combined survey- citizen science  
261 methods could also potentially be used to derive estimates of relative abundance in the region,  
262 which is not possible with our dataset.

263 Future perspectives:

264 The return of bluefin tuna to northern European waters opens many new possibilities for both  
265 scientific understanding of species biology/dynamics and for socio-economy. Regarding  
266 science, a priority should be to investigate the migration behaviour and population origin of the  
267 bluefin tunas which have appeared in these waters using a combination of modern tagging,  
268 genetics, otolith and modelling methods. Bluefin tuna in the Atlantic are managed as two stocks  
269 (western and eastern stocks, the latter including the Mediterranean) with separate quotas and  
270 other regulations (10). Historically, bluefin tuna caught in the northern European region had  
271 migrated both from the northeast and northwest Atlantic (12), and any future commercial or  
272 recreational catches should be assigned to the correct stock. Such assignment would need for  
273 example genetic or otolith-based evidence (39, 40).

274 New sustainable commercial and recreational fisheries would support and diversify local fishery  
275 economies in primarily rural areas of the region. Furthermore, given the recent interest in the  
276 general public for the return of this species to northern European waters (41, 42) (e. g., 5 video  
277 clips made by citizen scientists have been viewed on social media > 270,000 times:  
278 Supplementary Table S3), and the possibility that jumping bluefin tuna can be seen from  
279 relatively small boats operating within minutes to a few hours of shore, there is potential that the  
280 species could create and contribute to the eco-tourism industry.

281 A pre-requisite for realizing these scientific and socio-economic opportunities is that the recent  
282 fishery management regulations for both bluefin tuna and their prey, and their compliance,  
283 continues in future. In general, it presently appears as if efforts towards sustainable fishery  
284 management both for the bluefin tuna and its prey species are having positive benefits for these

285 stocks. Should this be true, bluefin tuna may become a regular summer component of local fish  
286 communities and food webs, and contribute to small but lucrative commercial and recreational  
287 fisheries and eco-tourism economies.

288 The re-establishment of summer migration to this region, together with the recent increase in  
289 overall stock biomass, indicates that, as with some other recovering large iconic fish stocks (3),  
290 improved management, enforcement and compliance can yield positive benefits when ecosystem  
291 conditions for stock production are suitable (3, 7). These observations apply even for species  
292 such as bluefin tuna which has historically suffered from much illegal and over-fishing and  
293 whose highly migratory behaviour takes them into multiple fishing jurisdictions including  
294 international waters. The reappearance of bluefin tuna in the Skagerrak-Kattegat and  
295 neighboring seas serves as an example of the benefits of implementing effective recovery  
296 actions, despite a decades-long absence from the region and a highly unsustainable fisheries  
297 exploitation situation. In this case, implementation has not been too late to promote recovery.  
298 Similar efforts with other populations and species could also yield positive outcomes. These  
299 findings offer some optimism for the long-term recovery and sustainability of commercially-  
300 exploited fish stocks, the ecosystems in which they live, and the economic sectors which they  
301 (could) support.

302

### 303 **Materials and Methods:**

304

305 General:

306 As there are presently no commercial, recreational or scientific fisheries (surveys) for bluefin  
307 tuna in the Skagerrak-Kattegat, the only source of information available for documenting  
308 presence were reports from the public, including commercial and recreational fisher  
309 observations. We consider all these records to be “citizen science” and compiled observations  
310 from reports in newspapers, social media and via direct contact of the public with us. Details for  
311 the data compilation are available below. The observations were then organized chronologically,  
312 assigned a record number and visualized to display their spatial-temporal distribution. To place  
313 our work in the historical context of past fisheries for bluefin tuna in the region, we compiled  
314 and plotted officially reported landings data from ICES and other historical sources (summarized  
315 in (24)) for the years 1903-2014, which was the last year for which landings data are available  
316 from ICES. We use officially reported data from ICES instead of from ICCAT because the  
317 former are available at higher spatial resolution for our region of interest.

318 Ecosystem conditions (e. g., local food concentrations, temperatures) are known to affect  
319 distributions of bluefin tuna (16, 28). We derived estimates of the inter-annual variability in  
320 abundance of major prey species and sea surface temperatures (i. e. those most likely  
321 experienced by bluefin tuna during summer foraging on the continental shelf) for the Northeast  
322 Atlantic to evaluate whether food and/or temperature conditions were unusually favorable in  
323 2015 and 2016 compared to earlier years. Further details of the data sources and compilation are  
324 presented below.

325 Bluefin tuna observations:

326 We compiled observations of bluefin tuna from primarily public sources such as social media (i.  
327 e., Facebook, YouTube) and websites representing both commercial fishermen and anglers in

328 Denmark and Sweden. We also obtained and used information sent to us by the public following  
329 announcements on the DTU Aqua website and sent to Danish commercial and sportsfishermens'  
330 organizations and contact by SLU Aqua with Swedish sportsfishermen that we were interested in  
331 receiving sighting observations. We supplemented these citizen science observations with  
332 reports of commercial catches and bycatches in the Norwegian Sea, North Sea, Skagerrak,  
333 Kattegat and Øresund. The time period covered was August-October 2016. However during the  
334 course of this data collection, we also received or found reports of observations in 2015 which  
335 we used to support our overall results and conclusions. In many cases, the sightings were  
336 supported by photographs or video recordings of bluefin tuna. The information provided by  
337 members of the public included date and location of the observation, how many bluefin tuna  
338 were observed (e. g., single individual, school, approximate number of schools and number of  
339 fish per school), behaviour (jumping over water surface, breaking water surface), and prey  
340 escape behaviours observed at the surface. The observations were entered into a database and  
341 visualized geographically to illustrate their spatial distribution in relation to distance from land,  
342 bottom topography and sea surface temperature.

343 Estimates of abundance of potential prey for bluefin tuna:

344 We estimated abundances of potential prey for bluefin tuna in the region from regional stock  
345 assessments for main prey species and from fishery research vessel surveys. We used the North  
346 Sea herring, Norwegian spring-spawning herring and Northeast Atlantic mackerel total stock  
347 biomass estimates from the ICES assessments as indicators of potential prey for bluefin tuna in  
348 the region of our study. These stocks occupy large areas (see ICES stock management area map,  
349 Supplementary Figure S1), which overlap with the historical distribution of bluefin tuna in the  
350 region (12, 14, 15, 24); moreover tuna which enter the Skagerrak and Kattegat historically



351 passed through the northern North Sea and Norwegian Sea on their way to this region (12, 15)  
352 and would potentially encounter these prey during the migration and while foraging for prey.  
353 These biomass estimates are based on stock assessments of the various stocks (29).

354 We also used scientific research vessel surveys to estimate prey abundances more locally in the  
355 Skagerrak-Kattegat and where bluefin tuna were observed in 2015 and 2016. Hydro-acoustic  
356 and bottom trawl surveys are conducted annually in the region as part of population status  
357 monitoring in the region for fisheries management purposes (43–46). The surveys are conducted  
358 in February-March (demersal survey in Kattegat-Belt Sea), late June-early July (hydro-acoustic  
359 pelagic survey in Skagerrak-Kattegat), and August-September (demersal survey in Skagerrak-  
360 Kattegat). The three surveys when considered in aggregate provide information about the  
361 relative abundance of potential prey (herring, sprat, mackerel) among years. The demersal  
362 survey in August-September is conducted when bluefin tuna were present in our area and we  
363 present its results in the main article; survey estimates at other times of year are presented as  
364 Supplementary Information.

365 The main characteristics of the surveys (depth sampled, geographic location, year and seasonal  
366 coverage) are summarized in Supplementary Table S1. The notable feature for all the surveys is  
367 that sampling methods and gear within each survey are the same throughout the time periods  
368 shown here (43–46). As seen in the Table, only the acoustic survey is directly designed to  
369 estimate abundance and biomass of pelagic fish species (e. g., herring, sprat); this survey is used  
370 as input to ICES stock assessments for herring in the western Baltic Sea and in the North Sea  
371 (43). The other two surveys are designed to capture demersal fish species as part of the  
372 International Bottom Trawl Survey (IBTS) (47) and Baltic International Trawl Survey (BITS)  
373 (44). However these surveys regularly capture pelagic fish species, including herring and sprat,

374 and these data can indicate relative trends and fluctuations in biomass, even though they may not  
375 necessarily represent true abundances due to lower catchability for pelagic fishes which are  
376 distributed higher in the water column than the demersal sampling gear. For the acoustic survey,  
377 we use the total abundances of all size groups estimated on the survey in specific strata of the  
378 survey (i. e., Kattegat, and waters along the Swedish west coast in the northeastern part of the  
379 Skagerrak (45)). For the demersal surveys, we calculated annual geometric means of catch-per-  
380 unit-effort (CPUE) using biomass/trawl hour as a relative biomass metric. Full details of the  
381 survey methods and sampling gear are available in literature (43–46, 48).

382 Estimation of sea surface temperature:

383 Bluefin tuna occupy mainly surface waters (i. e., above the seasonal thermocline) when feeding  
384 on continental shelves in summer as in the region of our study. This habitat is also the depth  
385 layer predominantly occupied by their main prey (e. g., herring, sprat, and mackerel) in the  
386 region. We assumed that sea surface temperature (SST) as estimated by satellite imagery is an  
387 approximate indicator of the temperatures available for and experienced by bluefin tuna while  
388 foraging in the region.

389 We calculated the average SST for the region for the months of August, September and October  
390 for the time period 1870-2016 using a large international database of in situ and satellite-derived  
391 observations(49) available online (<http://wps-web1.ceda.ac.uk/ui/home>) at 1 degree monthly  
392 resolution. This time series allowed us to evaluate whether 2015 and 2016 were exceptionally  
393 warm summers relative to historical variability and trends. We calculated mean temperatures for  
394 both the Skagerrak-Kattegat (8° – 13° E; 55° – 59° N) and a larger area of the northeast Atlantic  
395 Ocean (20° W – 13° E; 50° – 66° N) through which bluefin tuna migrate when entering the

396 Norwegian-North Sea-Skagerrak-Kattegat. We evaluated whether regime shifts in temperature  
397 occurred using the STARS algorithm (50); settings used for testing were Huber parameter = 1  
398 and series length = 10. Higher resolution (0.05 degree daily) satellite-based estimates of SST  
399 (51) in the Skagerrak and Kattegat region were averaged temporally over the main period where  
400 tuna were observed (7th – 21st September 2016) and used to characterize the thermal  
401 environment in which the fish were observed.

402

403 **Acknowledgments:** We thank Jeppe Olesen for GIS and mapping expertise and members of the  
404 public without whom this investigation could not have been possible. The work was partly  
405 supported by the Nordic Council of Ministers (project no. 141-2016-Tuna; NordTun) and has  
406 been conducted using MyOcean Products.

407

#### 408 **References:**

- 409 1. Worm B, et al. (2009) Rebuilding global fisheries. *Science* (80- ) 325:578–585.
- 410 2. Murawski SA (2010) Rebuilding depleted fish stocks: the good, the bad, and, mostly, the  
411 ugly. *ICES J Mar Sci J du Cons* 67(9):1830–1840.
- 412 3. Rose GA, Rowe S (2015) Northern cod comeback. *Can J Fish Aquat Sci* 72(12):1789–  
413 1798.
- 414 4. Pauly D (1995) Anecdotes and shifting baseline syndrome of fisheries. *Trends Ecol Evol*  
415 10:430.
- 416 5. Jackson JBC, et al. (2001) Historical overfishing and the recent collapse of coastal

- 417 ecosystems. *Science* (80- ) 293:629–638.
- 418 6. Lotze HK (2014) Lessons from historical ecology and management. *The Sea; Vol. 16:*  
419 *Marine Ecosystem-Based Management (568 Pp.)*, eds Fogarty M, McCarthy JJ (Harvard  
420 University Press, Cambridge, MA), pp 16–55.
- 421 7. Britten GL, Dowd M, Canary L, Worm B (2017) Extended fisheries recovery timelines in  
422 a changing environment. *Nat Commun* 8:15325.
- 423 8. Szuwalski CS, Vert-Pre KA, Punt AE, Branch TA, Hilborn R (2015) Examining common  
424 assumptions about recruitment: a meta-analysis of recruitment dynamics for worldwide  
425 marine fisheries. *Fish Fish* 16(4):633–648.
- 426 9. Cullis-Suzuki S, Pauly D (2010) Failing the high seas: A global evaluation of regional  
427 fisheries management organizations. *Mar Policy* 34(5):1036–1042.
- 428 10. ICCAT (2014) *Report of the 2014 Atlantic bluefin tuna stock assessment session, Madrid,*  
429 *Spain, September 22-27, 2014 (www.iccat.org)* (ICCAT, Madrid, Spain).
- 430 11. Fromentin J-M, Bonhommeau S, Arrizabalaga H, Kell LT (2014) The spectre of  
431 uncertainty in management of exploited fish stocks: The illustrative case of Atlantic  
432 bluefin tuna. *Mar Policy* 47:8–14.
- 433 12. Mather FJ, Mason JM, Jones AC (1995) Historical document: life history and fisheries of  
434 Atlantic bluefin tuna. *NOAA Tech Memo NMFS-SEFSC* 370:1–165.
- 435 13. Cury P, Anneville O, Bard FX, Fonteneau A, Roy C (1998) Obstinate north Atlantic  
436 bluefin tuna (*Thunnus thynnus thynnus*): an evolutionary perspective to consider  
437 spawning migration. *ICCAT CollVolSciPapers (Proc.of ICCAT Tuna Symp 1998, Part 1)*  
438 50:239–247.

- 439 14. Fromentin JM (2009) Lessons from the past: investigating historical data from bluefin  
440 tuna fisheries. *Fish Fish* 10(2):197–216.
- 441 15. Tiews K (1978) On the disappearance of bluefin tuna in the North Sea and its ecological  
442 implications for herring and mackerel. *RappP-vReunCons.intExplorMer* 172:301–309.
- 443 16. Fromentin J-M, Reygondeau G, Bonhommeau S, Beaugrand G (2013) Oceanographic  
444 changes and exploitation drive the spatio-temporal dynamics of Atlantic bluefin tuna  
445 (*Thunnus thynnus*). *Fish Oceanogr* 23:147–156.
- 446 17. De Luca G, Mariani P, MacKenzie BR, Marsili M (2014) Fishing out collective memory  
447 of migratory schools. *J R Soc Interface* 11 (2014):1–7.
- 448 18. Cort JL, Abaunza P (2015) The Fall of the Tuna Traps and the Collapse of the Atlantic  
449 Bluefin Tuna, *Thunnus thynnus* (L.), Fisheries of Northern Europe from the 1960s. *Rev*  
450 *Fish Sci Aquac* 23(4):346–373.
- 451 19. Bursell J (2016) 400 kilo+ tun genudsat i dansk farvand. *Fisk og Fri*. Available at:  
452 <http://www.fiskogfri.dk/> [Accessed September 23, 2016].
- 453 20. Aarøy TA (2016) Fikk 190 makrellstørjer på en gang. *Sysla (online newspaper)*. Available  
454 at: [http://sysla.no/2016/09/17/havbruk/fikk-190-makrellstorjer-pa-en-gang\\_157057/](http://sysla.no/2016/09/17/havbruk/fikk-190-makrellstorjer-pa-en-gang_157057/).
- 455 21. Tangen M (2016) Hillersøy med storkast for makrellstørje (English: The fishing vessel  
456 Hillersøy with a big catch of bluefin tuna). *Kystbloggen.com*. Available at:  
457 <http://www.webinntekt.com/blogg/?p=1534> [Accessed January 6, 2017].
- 458 22. Tangen Ø (2016) *Historisk storkast etter makrellstørje i 2016 (video)* (Norway) Available  
459 at: <https://www.youtube.com/watch?v=eXGZ4nUhk6w>.
- 460 23. Svendsen L (1949) *Tun: fiskeri af tunfisk* (J. Fr. Clausen, Copenhagen).

- 461 24. MacKenzie BR, Myers RA (2007) The development of the northern European fishery for  
462 north Atlantic bluefin tuna (*Thunnus thynnus*) during 1900-1950. *Fish Res* 87:229–239  
463 (doi:10.1016/j.fishres.2007.01.013).
- 464 25. Bauer R, Bonhommeau S, Brisset B, Fromentin J (2015) Aerial surveys to monitor bluefin  
465 tuna abundance and track efficiency of management measures. *Mar Ecol Prog Ser*  
466 534:221–234.
- 467 26. MacKenzie BR, Mosegaard H, Rosenberg AA (2009) Impending collapse of bluefin tuna  
468 in the northeast Atlantic and Mediterranean. *Conserv Lett* 2(1):26–35.
- 469 27. Worm B, Tittensor DP (2011) Range contraction in large pelagic predators. *Proc Natl*  
470 *Acad Sci U S A* 108(29):11942–11947.
- 471 28. MacKenzie BR, Payne MR, Boje J, Hoyer JL, Siegstad H (2014) A cascade of warming  
472 impacts brings bluefin tuna to Greenland waters. *Glob Chang Biol* 20(8):2484–2491.
- 473 29. ICES (2016) *Report of the ICES Advisory Committee. ICES Advice - Books 1-10.*  
474 (Copenhagen, Denmark).
- 475 30. Mariani P, Křivan V, MacKenzie BR, Mullon C (2015) The migration game in habitat  
476 network: the case of tuna. *Theor Ecol* 9(2):219–232.
- 477 31. Dufour F, Arrizabalaga H, Irigoien X, Santiago J (2007) Climate impacts on albacore and  
478 bluefin tunas migrations phenology and spatial distribution. *Prog Oceanogr* 86(1–2):283–  
479 290.
- 480 32. Druon J-N, et al. (2016) Habitat suitability of the Atlantic bluefin tuna by size class: an  
481 ecological niche approach. *Prog Oceanogr* 142:30–46.
- 482 33. Jansen T, et al. (2016) Ocean warming expands habitat of a rich natural resource and

- 483 benefits a national economy. *Ecol Appl*. doi:10.1002/eap.1384.
- 484 34. Lutcavage M, Kraus S, Hoggard W (1997) Aerial survey of giant bluefin tuna, *Thunnus*  
485 *thynnus*, in the great Bahama Bank, Straits of Florida, 1995. *Fish Bull* 95(2):300–310.
- 486 35. Kiszka J, Mourier J, Gastrich K, Heithaus M (2016) Using unmanned aerial vehicles  
487 (UAVs) to investigate shark and ray densities in a shallow coral lagoon. *Mar Ecol Prog*  
488 *Ser* 560:237–242.
- 489 36. Wilson SG, et al. (2015) Tracking the fidelity of Atlantic bluefin tuna released in  
490 Canadian waters to the Gulf of Mexico spawning grounds. *Can J Fish Aquat Sci*  
491 72(11):1700–1717.
- 492 37. Richardson DE, et al. (2016) Discovery of a spawning ground reveals diverse migration  
493 strategies in Atlantic bluefin tuna (*Thunnus thynnus*). *Proc Natl Acad Sci U S A*  
494 113(12):3299–304.
- 495 38. Chapman EW, Jorgensen C, Lutcavage ME (2011) Atlantic bluefin tuna (*Thunnus*  
496 *thynnus*): a state-dependent energy allocation model for growth, maturation, and  
497 reproductive investment. *Can J Fish Aquat Sci* 68(11):1934–1951.
- 498 39. Kumar G, Kocour M (2015) Population Genetic Structure of Tunas Inferred from  
499 Molecular Markers: A Review. *Rev Fish Sci Aquac* 23(1):72–89.
- 500 40. Rooker J, et al. (2014) Crossing the line: migratory and homing behaviors of Atlantic  
501 bluefin tuna. *Mar Ecol Prog Ser* 504:265–276.
- 502 41. Christiansen M, Gyldenkræne P (2016) Nordjysk lystfisker jubler: der er blåfannede tun  
503 overalt. *Danmarks Radio Nyheder*. Available at:  
504 <http://www.dr.dk/nyheder/indland/nordjysk-lystfisker-jubler-der-er-blaafannede-tun->

- 505 overall [Accessed September 26, 2016].
- 506 42. Fjeldseth Ø (2016) Vil ha sportsfiske etter størje. *NJFF Nyheter (Norges Jeger- og Fisk ;*  
507 *Nor Hunt Sportfish Assoc.* Available at: [https://www.njff.no/nyheter/Sider/NJFF-vil-ha-](https://www.njff.no/nyheter/Sider/NJFF-vil-ha-sportsfiske-etter-storje.aspx)  
508 [sportsfiske-etter-storje.aspx](https://www.njff.no/nyheter/Sider/NJFF-vil-ha-sportsfiske-etter-storje.aspx).
- 509 43. ICES (2016) *First interim report of the ICES Working Group on International Pelagic*  
510 *Surveys (WGIPS)* (Copenhagen) Available at: [www.ices.dk](http://www.ices.dk).
- 511 44. ICES (2016) Second interim report of the Baltic International Fish Survey Working Group  
512 (WGBIFS), 30 March - 3 April, 2016, Rostock, Germany. *ICES C 2016/SSGIEOM 07:1–*  
513 *597*.
- 514 45. Stæhr K-J (2016) *Acoustic herring survey report for RV “Dana” 2nd June - 5th July,*  
515 *2016* (Charlottenlund, Denmark).
- 516 46. Eigaard OR, Støttrup JG, Hofmann E, Hovgård H (2003) *DFU’s standardtrawl:*  
517 *konstruktion og sammenlignende fiskeri (DFU-rapport No. 126-03) (in Danish)*  
518 (Charlottenlund, Denmark).
- 519 47. ICES (2012) *Manual for the International Bottom Trawl Surveys. Series of ICES Survey*  
520 *Protocols. SISP I-IBTS VIII* (Copenhagen, Denmark) Available at: [www.ices.dk](http://www.ices.dk).
- 521 48. ICES (2013) *Manual for the Baltic International Trawl Surveys (BITS) - Addendum 1:*  
522 *WGBIFS BITS Manual 2013* (Copenhagen, Denmark) Available at: [www.ices.dk](http://www.ices.dk).
- 523 49. Rayner NA, et al. (2003) Global analyses of sea surface temperature, sea ice and night  
524 marine air temperature since the late nineteenth century. *JGeophysRes* 108:4407–doi:  
525 10.1029/2002JD002670 (updates available).
- 526 50. Rodionov S, Overland J (2005) Application of a sequential regime shift detection method



527 to the Bering Sea ecosystem. *ICES J Mar Sci* 62(3):328–332.

528 51. Donlon CJ, et al. (2012) The Operational Sea Surface Temperature and Sea Ice Analysis  
529 (OSTIA) system. *Remote Sens Environ* 116:140–158.

530 52. ICES (2016) *ICES Advice* (International Council for the Exploration of the Sea,  
531 Copenhagen, Denmark).

532

533

534

535 **Figure legends (figures are located after legends):**

536 Figure 1. Locations where individual or schools of bluefin tuna were observed in Skagerrak-  
537 Kattegat-Øresund in 2015 and 2016. Numbers beside observations correspond to records in  
538 Table S1. Colour contours: averaged sea surface temperature as derived from satellite imagery  
539 (51) during Sept. 7-21, 2016. Black contour lines: bottom topography. Red box on main map  
540 shows where one of the authors (HSL) saw hundreds of bluefin tuna in schools during several  
541 days centred on Sept. 22, 2016. Red star on inset map: location where 190 bluefin tuna were  
542 captured on Sept. 17, 2016 in one haul by a Norwegian commercial fishing boat (21).

543 Figure 2. Photographic documentation of presence and jumping behaviour of bluefin tuna in the  
544 Skagerrak and Kattegat in a historical period (1947 (23)) and in 2016 (four lower photographs).  
545 The photographs 3-6 correspond to observation numbers 8, 11, 6 and 11 respectively in Table  
546 S2. The historical photographs illustrate the similarity of historical bluefin tuna size, shape and  
547 behaviour with that observed in 2016. Additional photographs and links to web-based video

548 clips on social media are available in Supplementary Figure S3 and Table S3. All images are  
549 reproduced with permission from photographers.

550 Figure 3. Indicators of potential prey biomass and temperature conditions in the Skagerrak-  
551 Kattegat and neighboring regions. A: interannual variability in total stock biomass of key prey  
552 species (and their sum) for bluefin tuna in northern European continental shelf regions. The  
553 stocks are autumn-spawning herring in the North Sea, spring-spawning herring in the  
554 Norwegian-Barents Sea, and mackerel in the northeast Atlantic (52). B: mean ln CPUE (ln  
555 kg/hour + 0.001;  $\pm 2$  x standard error) for herring, sprat, mackerel and anchovy in the Skagerrak-  
556 Kattegat during August-September research vessel surveys. C: inter-annual variability in late  
557 summer-autumn (mean of August, September and October) sea surface temperature in the  
558 Skagerrak-Kattegat and a larger area of the northeast Atlantic (20° W – 13° E; 50° – 66° N) for  
559 1870-2016 (black solid line with dots and black dashed line with squares) and regime-specific  
560 mean temperatures (red: Skagerrak-Kattegat; blue: northeast Atlantic) for different statistically  
561 significant regimes (50). Data source: Hadley Climate Research Unit, UK (49)).

562

563

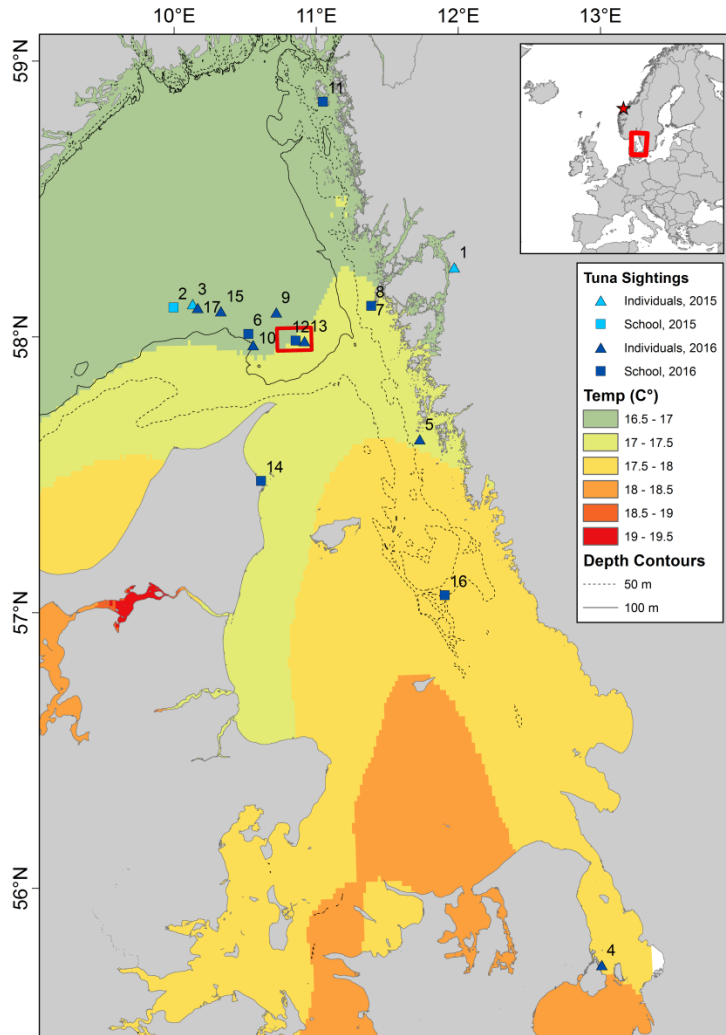

564

565 Figure 1.

566

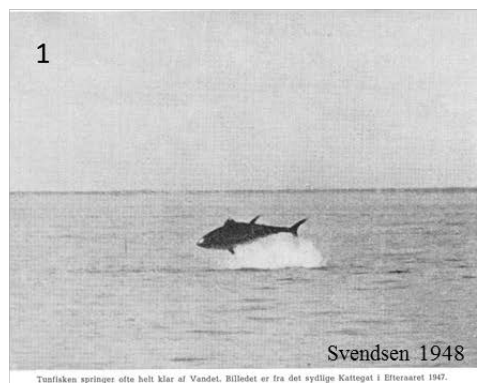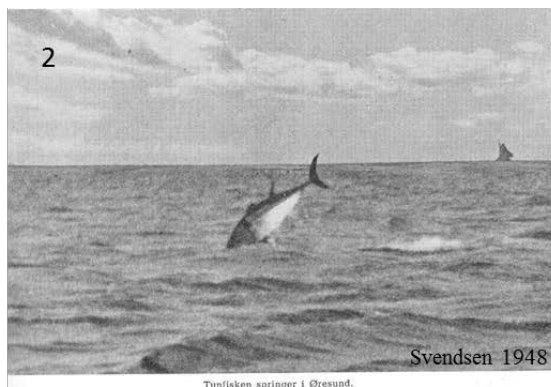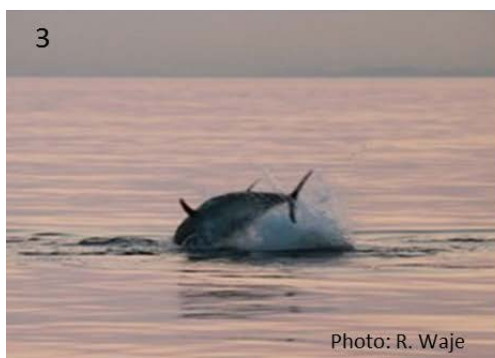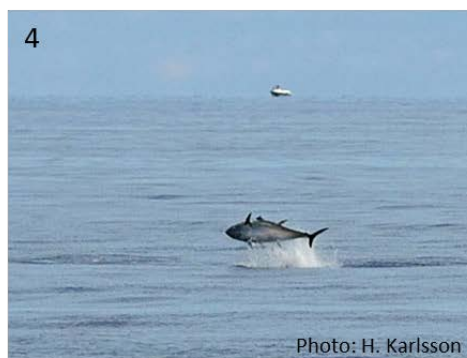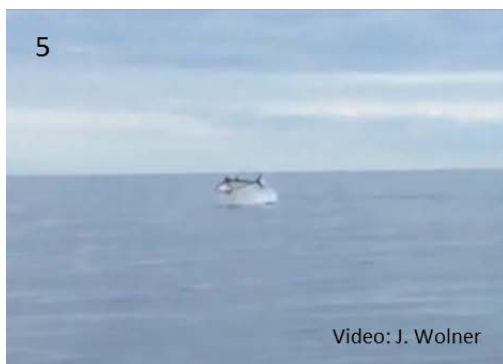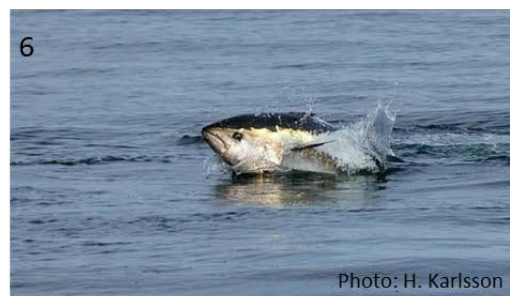

567

568 Figure 2.

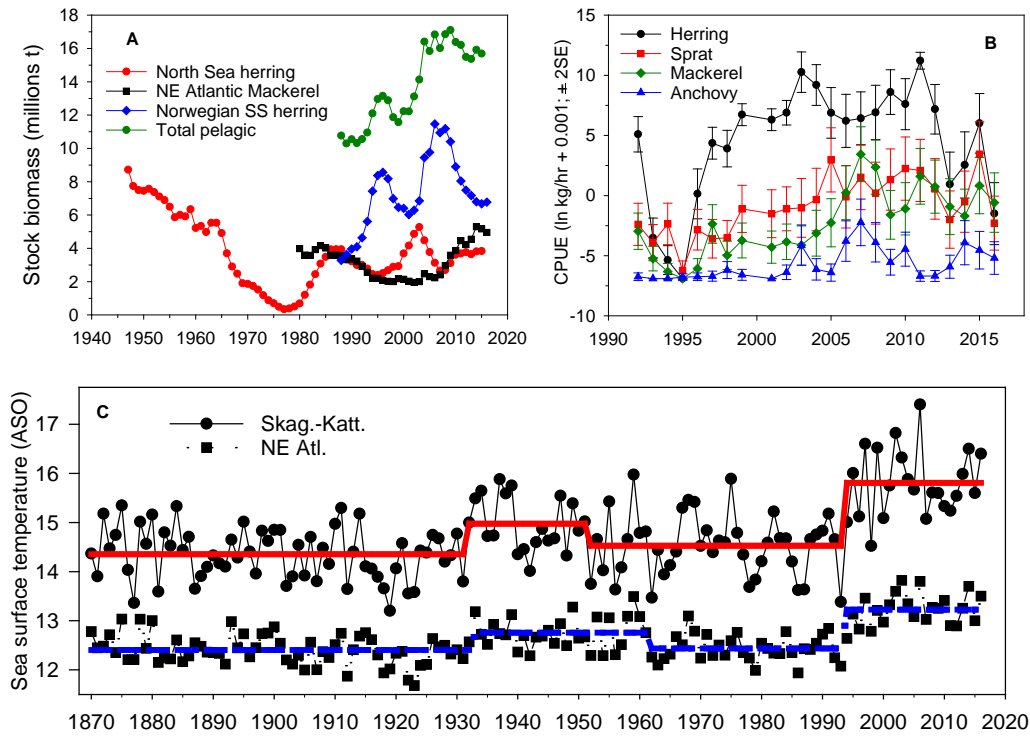

569

570 Figure 3.

571

572 **Supplementary Materials:**

573

574 **Supplementary Figures:**

575 Figure S1. ICES fishery stock management areas.

576

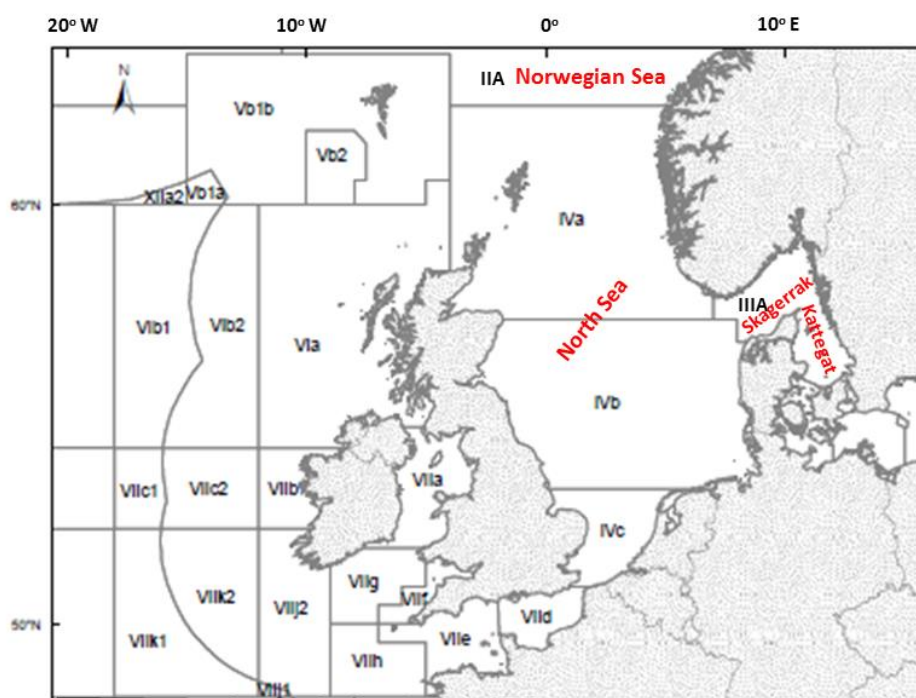

577

578

579

580 Figure S2. Reported catches of bluefin tuna in ICES areas II, III and IV corresponding  
581 approximately to respectively the Norwegian Sea, North Sea, and Skagerrak-Kattegat-Øresund  
582 (see Figure S1 for map of ICES stock management areas). Catch data officially reported to ICES  
583 from 1903-2014 are from ICES databases available online ([www.ices.dk](http://www.ices.dk)). Additional catch data  
584 from before 1927 were compiled from historical fishery reports, catch records, museum records  
585 and other documents as summarized in (24).

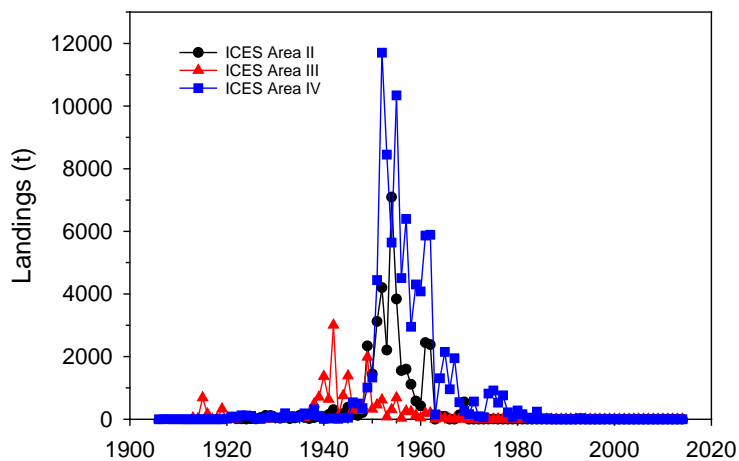

586

587

588 Figure S3. Photographs showing bluefin tuna in the Skagerrak-Kattegat during September 2016.

589 Photos provided with permission by members of the public. Collage 1: R. Waje, collage 2: H.

590 Karlsson, collage 3: J. Wolner.

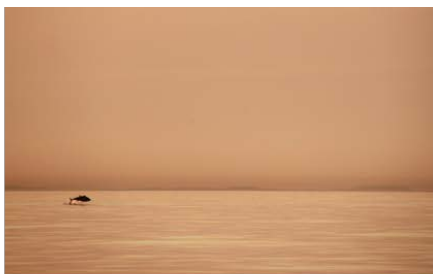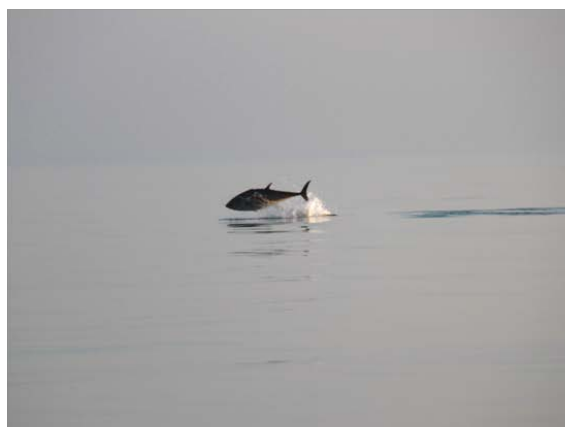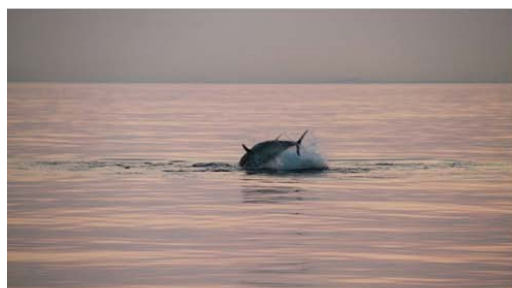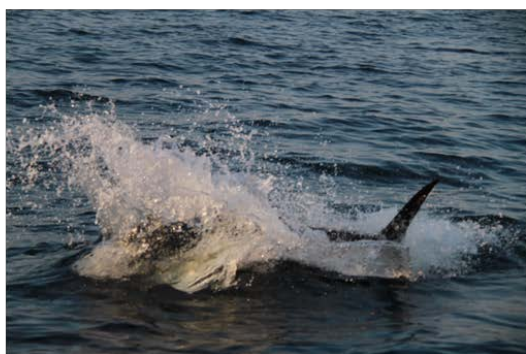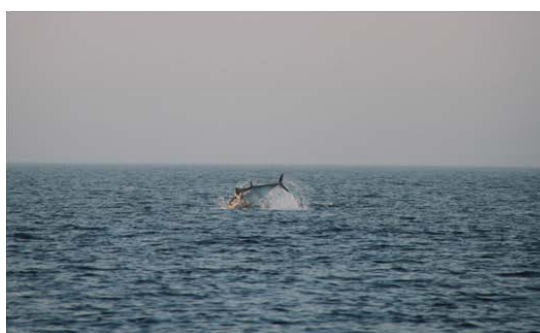

591

592 Collage 1 – R. Waje.

593



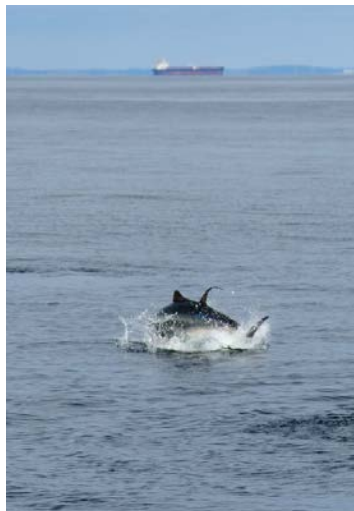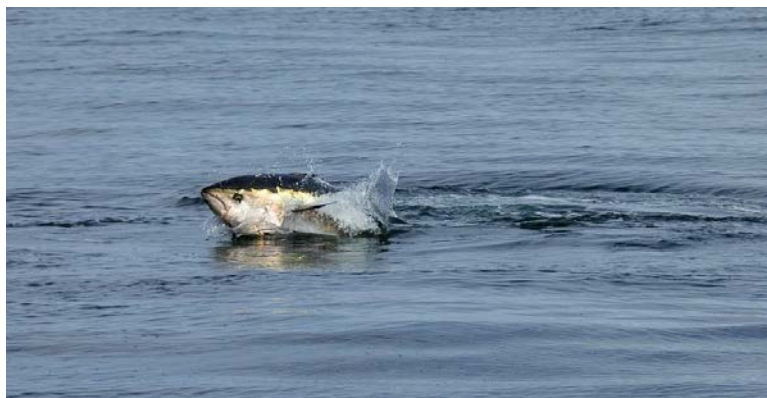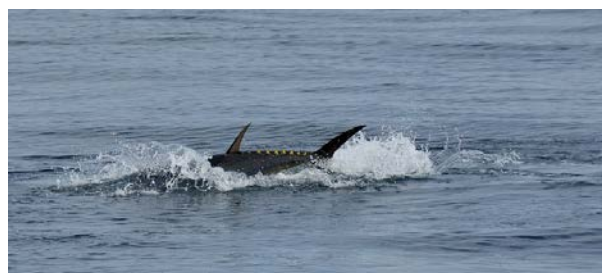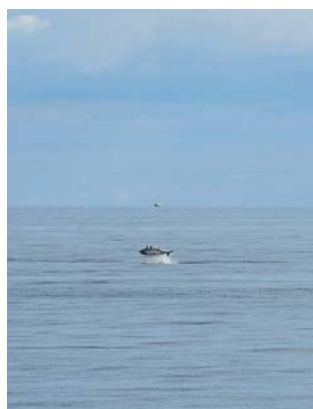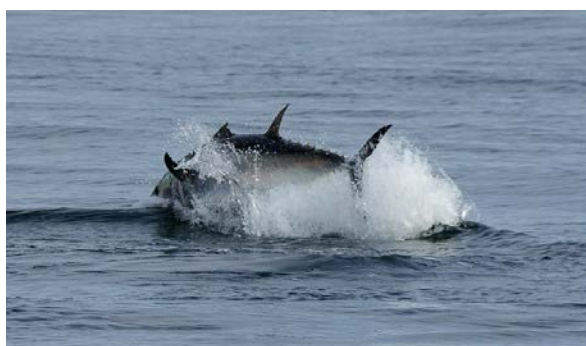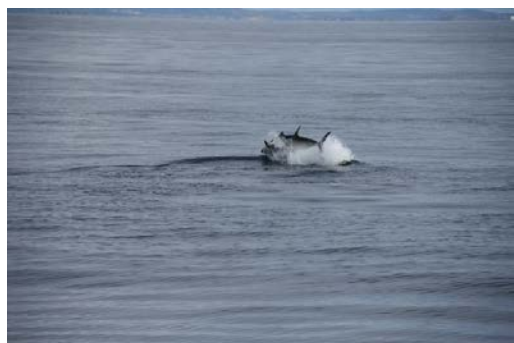

594

595 Collage 2: H. Karlsson

596

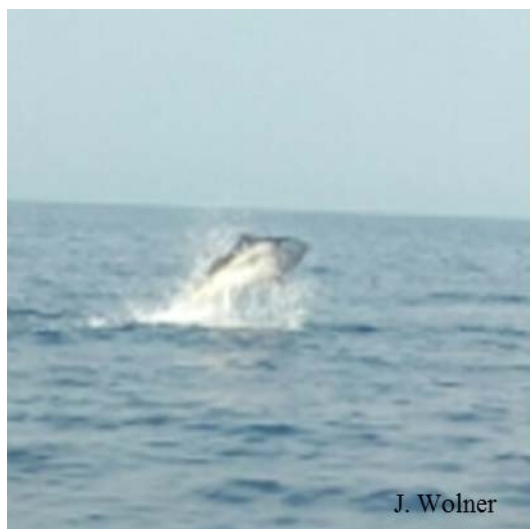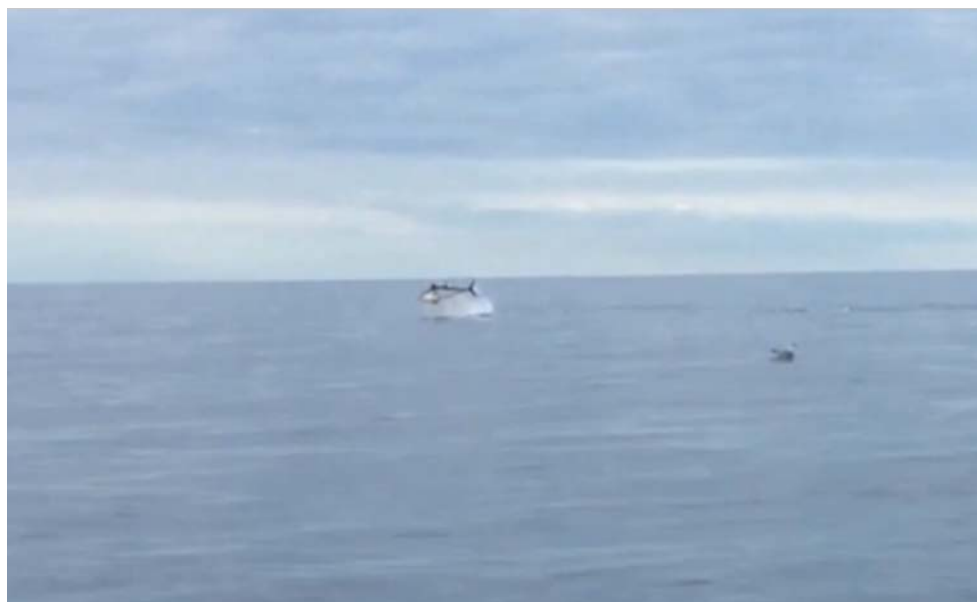

597

598 Collage 3: J. Wolner

599

600

601 Figure S4. A: mean ln CPUE (ln kg/hour + 0.001;  $\pm 2$  x standard error) for herring, sprat and  
602 anchovy in autumn (late October-early November) research trawl surveys in Kattegat-Øresund-  
603 Belt Sea (north of 55 N.) during 1994-2016. B: estimates of prey biomass as derived from  
604 research vessel hydro-acoustic surveys in the Skagerrak-Kattegat-Øresund during 2008-2016  
605 (see Table S1 for survey details).

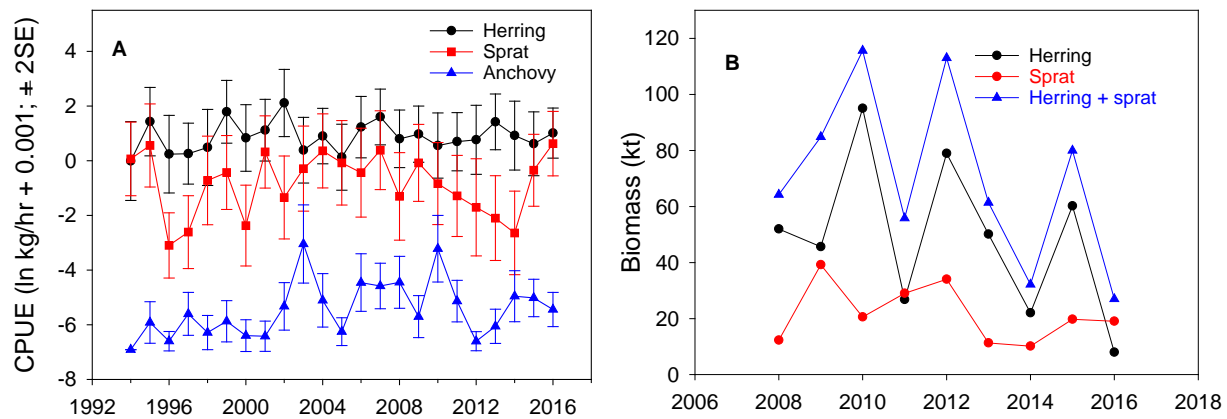

606

607

608

609

610

611 **Supplementary Tables:**

612 Table S1. Overview of research vessel surveys which provided estimates of biomass of potential  
613 prey for bluefin tuna in the Skagerrak-Kattegat-Øresund. The surveys are part of international  
614 bottom-trawl and acoustic surveys in the region designed and coordinated internationally by  
615 ICES.

| Characteristic | Survey vessel                                    |                                                                       |                                  |
|----------------|--------------------------------------------------|-----------------------------------------------------------------------|----------------------------------|
|                | RV Havfisken<br>(Denmark)                        | RV Dana (Denmark)                                                     | RV Argos (Sweden)                |
| Sampling gear  | Demersal trawl                                   | Hydro-acoustics<br>with pelagic and<br>demersal<br>calibration trawls | Demersal trawl                   |
| Year coverage  | 1994-2016<br>(October-<br>November)              | 2008-2016                                                             | 1992-2016 (August-<br>September) |
| Location       | Kattegat, Øresund,<br>Belt Sea north of 55<br>N. | Skagerrak, Kattegat                                                   | Skagerrak, Kattegat              |
| Target species | Demersal fish<br>community                       | Herring and sprat                                                     | Demersal fish<br>community       |

616

617

618 Table S2. Observational data for sightings of bluefin tuna individuals and schools in the  
 619 Skagerrak, Kattegat and Øresund during 2015 and 2016. The data were recorded by members of  
 620 the public (“citizen scientists”). The observation record numbers correspond to the sightings  
 621 displayed visually in the map in Figure 1 of the main manuscript. Observers’ identities are  
 622 known to the authors.

623

| Obs. ID no. | Date           | Latitude | Longitude | Approx. Number of individuals                                               | School or Individuals? |
|-------------|----------------|----------|-----------|-----------------------------------------------------------------------------|------------------------|
| 1           | Aug. 7, 2015   | 58.21947 | 11.90087  | 1                                                                           | Individuals            |
| 2           | Sept. 10, 2015 | 58.103   | 9.967     | several schools, with individuals jumping. Probably ca. 1000 tuna in total. | School                 |
| 3           | Sept. 21, 2015 | 58.0994  | 10.1363   | 2                                                                           | Individuals            |
| 4           | Aug. 12, 2016  | 55.66719 | 12.65734  | 1                                                                           | Individuals            |
| 5           | Aug. 21, 2016  | 57.60167 | 11.61889  | 1                                                                           | Individuals            |
| 6           | Sept. 13, 2016 | 58.00264 | 10.47578  | > 100                                                                       | School                 |
| 7           | Sept. 15, 2016 | 58.09183 | 11.32073  | "enormous school"                                                           | School                 |
| 8           | Sept. 16, 2016 | 58.09183 | 11.32073  | ca. 100                                                                     | School                 |
| 9           | Sept. 19, 2016 | 58.078   | 10.67     | 1                                                                           | Individuals            |
| 10          | Sept. 21, 2016 | 57.96167 | 10.50667  | 1                                                                           | Individuals            |
| 11          | Sept. 21, 2016 | 58.83729 | 11.03239  | a whole school                                                              | School                 |
| 12          | Sept. 22, 2016 | 57.97375 | 10.79687  | Some fishermen saw 100s in                                                  | School                 |

|    |                |          |          |                                                                                                                                                                                                                                                                                          |             |
|----|----------------|----------|----------|------------------------------------------------------------------------------------------------------------------------------------------------------------------------------------------------------------------------------------------------------------------------------------------|-------------|
|    |                |          |          | schools of different sizes. Other fisherman "saw several jumping tuna, lots of large splashes and individual tunas under boat seen on sonar" (Danish: "Så adskillige springende tun, rigtig mange store plask og enkelte fisk under båden på loddet."). Others seen in previous 14 days. |             |
| 13 | Sept. 24, 2016 | 57.97167 | 10.85833 | 1                                                                                                                                                                                                                                                                                        | Individuals |
| 14 | Sept. 30, 2016 | 57.469   | 10.539   | Small school (6-8 individual fish)                                                                                                                                                                                                                                                       | School      |
| 15 | Oct. 13, 2016  | 58.087   | 10.29167 | 1                                                                                                                                                                                                                                                                                        | Individuals |
| 16 | Oct. 17, 2016  | 57.033   | 11.7447  | ca. 5-10                                                                                                                                                                                                                                                                                 | School      |
| 17 | Oct. 20, 2016  | 58.1     | 10.13333 | 1                                                                                                                                                                                                                                                                                        | Individuals |

625 Table S3. Examples of videos on social media of bluefin tuna *Thunnus thynnus* swimming and  
 626 jumping at surface in the Skagerrak-Kattegat and off Norway during 2015 and 2016. Also  
 627 indicated is the number of views of each videoclip. The total number of views was 270,291 as  
 628 of July 12, 2017.

629

| Link                                                                                                  | Location                                  | Date recorded<br>or uploaded                                      | Filmmaker                                  | Comments<br>and notes                                                       | Views<br>as of<br>July 12,<br>2017 |
|-------------------------------------------------------------------------------------------------------|-------------------------------------------|-------------------------------------------------------------------|--------------------------------------------|-----------------------------------------------------------------------------|------------------------------------|
| <a href="https://www.youtube.com/watch?v=IKOF843Ew74">https://www.youtube.com/watch?v=IKOF843Ew74</a> | Skagerrak                                 | Sept. 10, 2015<br>(recorded)<br>Sept. 11, 2015<br>(uploaded)      | Thomas<br>Kolmorgen;<br>Fiskeavisen<br>.dk |                                                                             | 23,346                             |
| <a href="https://www.youtube.com/watch?v=Rd9mRhHTpt0">https://www.youtube.com/watch?v=Rd9mRhHTpt0</a> | Swedish<br>west coast,<br>near<br>Måskeår | Sept. 15<br>(recorded),<br>2016                                   | Micael<br>Karlsson                         |                                                                             | 40,961                             |
| <a href="https://www.youtube.com/watch?v=eXGZ4nUhk6w">https://www.youtube.com/watch?v=eXGZ4nUhk6w</a> | Ona, Møre,<br>Norway                      | Sept. 16-17,<br>2016<br>(recorded)<br>Oct. 11, 2016<br>(uploaded) | Magnus<br>Tangen                           | Short<br>documenta<br>ry (7:22) of<br>commercial<br>fishing on<br>Norwegian | 85,995                             |

|                                                                         |                         |                                                              |                 |                                                                        |         |
|-------------------------------------------------------------------------|-------------------------|--------------------------------------------------------------|-----------------|------------------------------------------------------------------------|---------|
|                                                                         |                         |                                                              |                 | vessel<br>Hillersøy,<br>which<br>captured<br>190 tunas<br>in one haul. |         |
| <a href="https://youtu.be/ESL0vS_NZRk">https://youtu.be/ESL0vS_NZRk</a> | Skagerrak               | Sept. 18, 2016<br>(recorded)<br>Sept. 21, 2016<br>(uploaded) | Uffe<br>Nielsen | Exact<br>location not<br>specified.<br>Can see<br>tuna in<br>distance. | 115,520 |
| <a href="https://youtu.be/GSmDHQyDud8">https://youtu.be/GSmDHQyDud8</a> | West coast<br>of Sweden | Uploaded<br>Sept. 17, 2016                                   | Bo<br>Svensson  | Very clear<br>and sharp<br>video; calm<br>water, easy<br>to see tuna   | 4,469   |



631

632 **Author Contributions:** BRM designed research, compiled data and wrote the manuscript; all  
633 authors contributed to the design of the study and edited drafts of the manuscript. KA, MCh  
634 assisted with data collection in Denmark and MCh assisted with data collection in Sweden. CS  
635 and HSL assisted with data collection from recreational and commercial fishers. MRP produced  
636 satellite imagery temperature products.

637

638

639

640
